# Supplementary material for: The Hidden Struggles of Medical Training: A View of Lifestyle and Eating Behaviours in Palestine- a Cross-Sectional study
Source: Research Square preprint supplement (doi:10.21203/rs.3.rs-7437425/v1), 2025-09-06
Supplement: Supplementary file 1 [file 4cc1da6cf5e6fb5fcd17c681.docx]

| **Consent Form:**  Before proceeding, please read the following information carefully:  The purpose of this research is to explore lifestyle factors among Palestinian medical students, including physical activity, barriers to exercise, sleep patterns, and nutritional habits. The findings will help understand how these factors influence students' well-being.  **Voluntary Participation:**  Participation in this study is completely voluntary. You have the right to decline to answer any question or to withdraw from the study at any point without any penalty.  **Confidentiality:**  All responses will be anonymized and kept strictly confidential. The data collected will be used solely for research purposes and stored securely.  **Duration:**  Completing the questionnaire will take approximately 10 to 15  minutes.  **Contact Information:**   If you have any questions about the study, please contact the research team at (mahdiwsobh@gmail.com /00972595977903).  **I agree to complete this questionnaire, ensuring my privacy is respected.**  **Thank you for your time and valuable contribution.**  This revised questionnaire is designed to explore lifestyle factors among Palestinian medical students, including physical activity, barriers to exercise, sleep patterns, and nutritional habits. | | | | | | | | | | | | | | | | |
| --- | --- | --- | --- | --- | --- | --- | --- | --- | --- | --- | --- | --- | --- | --- | --- | --- |
| **"Lifestyle Determinants of Health: Physical Activity, Exercise Barriers, Sleep, and Nutrition Habits Among Palestinian Medical Students"** | | | | | | | | | | | | | | | | |
| **Section 1: Demographic information** | | | | | | | | | | | | | | | | |
|  | | | | | | | | | | |  | | | | | |
| University name | | | | | | | | | | | -( ) Palestine Polytechnic University  -( ) Al-Quds University  -( ) An-Najah National University  -( ) Hebron University  -( ) Arab American University | | | | | |
| Year of study | | | | | | | | | | | -( )1st  -( )2nd  -( )3rd  -( )4th  -( )5th  -( )6th | | | | | |
| GPA | | | | | | | | | | | -( )Less than 1.67 (60)  -( )1.67-1.99 (60-64.9)  -( )2-2.32 (65-69.9)  -( )2.33-2.99 (70-79.9)  -( )3-3.66 (80-89.9)  -( )3.67-4 (90-100) | | | | | |
| Age"........ year" | | | | | | | | | | | -( )18  -( )19  -( )20  -( )21  -( )22  -( )23  -( )24  -( )25  -( ) 26 or more | | | | | |
| Gender | | | | | | | | | | | -( ) Male  -( ) Female | | | | | |
| Weight in kg? | | | | | | | | | | | Short-answer text | | | | | |
| waist circumference in cm? (You can answer I don’t know) | | | | | | | | | | | Short-answer text | | | | | |
| occupational status | | | | | | | | | | | -( )Not employed  -( )Part-time employment  -( )Full-time employment | | | | | |
| Marital Status | | | | | | | | | | | -( ) Single  -( ) Married  -( ) Engaged  -( ) Divorced | | | | | |
| Do you suffer from any medical condition that affect your ability to engage in physical activities ? | | | | | | | | | | | -( )Yes  -( )No | | | | | |
| If you have a medical conditions please describe it: | | | | | | | | | | | Long-answer text: | | | | | |
| What is your current smoking status? | | | | | | | | | | | -( ) I have never smoked  -( ) I am a former smoker (not smoking in the last 30 days)  -( ) I am a current smoker (1 to 10 cigarettes daily )  -( ) I am a current smoker (11 to 20 cigarettes daily)  -( ) I am a current smoker ( more than 20 cigarettes daily) | | | | | |
| what type of smoking do you use ? | | | | | | | | | | | -( ) Cigarette Smoking  -( ) Hookah/Waterpipe Smoking  -( ) E-Cigarettes/Vaping  -( ) I do not smoke | | | | | |
| Do you suffer from any of these symptoms?you can choose more than one answer | | | | | | | | | | | -( ) Insomnia  -( ) Anxiety  -( ) Loss of appetite  -( ) Chronic pain  -( ) I don't suffer any of these symptoms | | | | | |
| Which governorate did you live in before university? | | | | | | | | | | | ( ) Tubas  ( ) Jenin  ( ) Nablus  ( ) Salfit  ( ) Tulkarm  ( ) Qalqilya  ( ) Ramallah  ( ) Bethlehem  ( ) Hebron  ( ) Jerusalem  ( ) **Outside Palestine**  ( ) **1948 Territories (Occupied Interior)** | | | | | |
| What type of residential area did you live in before university? | | | | | | | | | | | -( ) Refugee camp  -( ) Village  -( ) City  -( ) Bedouin area | | | | | |
| The governorate where you currently reside based on your university study location? | | | | | | | | | | | ( ) Tubas  ( ) Jenin  ( ) Nablus  ( ) Salfit  ( ) Tulkarm  ( ) Qalqilya  ( ) Ramallah  ( ) Bethlehem  ( ) Hebron  ( ) Jerusalem | | | | | |
| What type of accommodation do you live in during your university studies? | | | | | | | | | | | -( ) I live with my family  -( ) I live in shared university housing  -( ) I live in a private dormitory  -( ) I live with relatives | | | | | |
| What is your monthly expenditure (including personal expenses, food, transportation, clothing, and university supplies, excluding housing) in Israeli shekels? | | | | | | | | | | | -( ) less than 500  -( ) 500-1000  -( ) 1000-1500  -( ) 1500-2000  -( ) 2000-2500  -( ) 2500-3000  -( ) more than 3000 | | | | | |
| **Section 2: Physical Activity Levels** | | | | | | | | | | | | | | | | |
|  | | | | | | | | | | | | | | | | |
| How many days did you do vigorous physical activities at least for 10 minutes (such as jogging, aerobics, or heavy lifting) in the past seven days? | | | | | | | | | -( ) 0 day  -( ) 1 day  -( ) 2 days  -( ) 3 days  -( ) 4 days  -( ) 5 days  -( ) 6 days  -( ) 7 days | | | | | | |
| During the last 7 days, on how many days did you do moderate physical activities at least for 10 minutes like carrying light loads, cycling at a regular pace, or doubles tennis? Do not include walking. | | | | | | | | | -( ) 0 day  -( ) 1 day  -( ) 2 days  -( ) 3 days  -( ) 4 days  -( ) 5 days  -( ) 6 days  -( ) 7 days | | | | | | |
| During the last 7 days, on how many days did you walk for at least 10 minutes at a time? | | | | | | | | | -( ) 0 day  -( ) 1 day  -( ) 2 days  -( ) 3 days  -( ) 4 days  -( ) 5 days  -( ) 6 days  -( ) 7 days | | | | | | |
| how much time did you spend usually engaging in vigorous physical activity per day? | | | | | | | | | | -( ) Less than 15 minutes  -( ) 15-29 minutes  -( ) 30-59 minutes  -( ) 60-89 minutes  -( ) 90 minutes or more | | | | | | |
| How much time did you usually spend doing moderate physical activities on one of those days? | | | | | | | | | | -( ) Less than 15 minutes  -( ) 15-29 minutes  -( ) 30-59 minutes  -( ) 60-89 minutes  -( ) 90 minutes or more | | | | | | |
| On one of those days, how much time did you usually spend walking? | | | | | | | | | | -( ) Less than 15 minutes  -( ) 15-29 minutes  -( ) 30-59 minutes  -( ) 60-89 minutes  -( ) 90 minutes or more | | | | | | |
| how many hours do you spend sitting on one day (e.g., at work, at home, while watching TV, or using a computer)? | | | | | | | | | | -( ) 1 hour  -( ) 2 hours  -( ) 3 hours  -( ) 4 hours  -( ) 5 hours  -( ) 6 hours  -( ) 7 hours  -( ) 8 hours  -Add option | | | | | | |
| **Section 3: Sleeping habits** | | | | | | | | | | | | | | | | |
| During the past month, what time have you usually gone to bed at night? Bed time | | | | | | | | | | Short-answer text | | | | | | |
| During the past month, how long (in minutes) has it usually taken you to fall asleep each night?number of minutes | | | | | | | | | | Short-answer text | | | | | | |
| During the past month, what time have you usually gotten up in the morning? Getting up time | | | | | | | | | | Short-answer text | | | | | | |
| During the past month, how many hours of actual sleep did you get at night? Hours of sleep per night | | | | | | | | | | Short-answer text | | | | | | |
|  | | | Not during the past month | | | | Less than once a week | | | Once or twice a week | | | Three or more time a week | | | |
| 1.Cannot get to sleep within 30 minutes | | |  | | | |  | | |  | | |  | | | |
| 2. Wake up in the middle of the night or early morning | | |  | | | |  | | |  | | |  | | | |
| 3. Have to get up to use the bathroom. | | |  | | | |  | | |  | | |  | | | |
| 4. Cannot breathe comfortably | | |  | | | |  | | |  | | |  | | | |
| 5. Cough or snore loudly | | |  | | | |  | | |  | | |  | | | |
| 6. Feel too cold | | |  | | | |  | | |  | | |  | | | |
| 7. Feel too hot | | |  | | | |  | | |  | | |  | | | |
| 8. Had bad dreams | | |  | | | |  | | |  | | |  | | | |
| 9. Have pain | | |  | | | |  | | |  | | |  | | | |
| Other reason(s), please describe: | | | | | | | | | | Long-answer text | | | | | | |
| If you write other reason please answer this question:How often during the past month have you had trouble sleeping because of this? | | | | | | | | | | -( ) Not during the past month  -( ) Less than once a week  -( ) Once or twice a week  -( ) Three or more time a week | | | | | | |
| During the past month, how would you rate your sleep quality overall? | | | | | | | | | | -( ) Very good  -( ) Fairly good  -( ) Fairly bad  -( ) Very bad | | | | | | |
| During the past month, how often have you taken medicine to help you sleep (prescribed or “over the counter”)? | | | | | | | | | | -( ) Not during the past month  -( ) Less than once a week  -( ) Once or twice a week  -( ) Three or more time a week | | | | | | |
| During the past month, how often have you had trouble staying awake while driving, eating meals, or engaging in social activity? | | | | | | | | | | -( ) Not during the past month  -( ) Less than once a week  -( ) Once or twice a week  -( ) Three or more time a week | | | | | | |
| During the past month, how much of a problem has it been for you to keep up enough enthusiasm to get things done? | | | | | | | | | | -( ) No problem at all  -( ) Only a very slight problem  -( ) somewhat of a problem  -( ) A very big problem | | | | | | |
| Do you have a bed partner or room mate? | | | | | | | | | | -( ) No bed partner or room mate  -( ) partner/room mate in othe room  -( ) partner in same room,but not same bed  -( ) partner in same bed | | | | | | |
| If you have a room mate or bed partner, ask him/her how often in the past month you have had: | | | | | | | | | | | | | | | | |
|  | | | | | Not during the past month | | | | | Less than once a week | | | Once or twice a week | | Three or more times a week | |
| Loud snoring | | | | |  | | | | |  | | |  | |  | |
| Long pauses between breaths while asleep | | | | |  | | | | |  | | |  | |  | |
| Legs twitching or jerking while you sleep | | | | |  | | | | |  | | |  | |  | |
| Episodes of disorientation or confusion during sleep | | | | |  | | | | |  | | |  | |  | |
| Other restlessness while you sleep; please describe | | | | | | | | | | Short-answer text | | | | | | |
| In case you describe restlessness while sleeping please choose the best option to describe it's frequancy | | | | | | | | | | -( ) Not during the past month  -( ) Less than once a week  -( ) Once or twice a week  -( ) Three or more time a week | | | | | | |
| **Section 3: Eating habits** | | | | | | | | | | | | | | | | |
|  | | Always | | | | Usually | | Often | | | | Sometimes | | Rarely | | Never |
| 1. I am terrified about being overweight. | |  | | | |  | |  | | | |  | |  | |  |
| 2. I avoid eating when I am hungry. | |  | | | |  | |  | | | |  | |  | |  |
| 3. I find myself preoccupied with food. | |  | | | |  | |  | | | |  | |  | |  |
| 4. I have gone on eating binges where I feel that I may not be able to stop. | |  | | | |  | |  | | | |  | |  | |  |
| 5. I cut my food into small pieces. | |  | | | |  | |  | | | |  | |  | |  |
| 6. I aware of the calorie content of foods that I eat. | |  | | | |  | |  | | | |  | |  | |  |
| 7. I particularly avoid food with a high carbohydrate content (i.e. bread, rice, potatoes, etc.) | |  | | | |  | |  | | | |  | |  | |  |
| 8. I feel that others would prefer if I ate more. | |  | | | |  | |  | | | |  | |  | |  |
| 9. I vomit after I have eaten. | |  | | | |  | |  | | | |  | |  | |  |
| 10. I feel extremely guilty after eating. | |  | | | |  | |  | | | |  | |  | |  |
| 11. I am occupied with a desire to be thinner. | |  | | | |  | |  | | | |  | |  | |  |
| 12. I think about burning up calories when I exercise. | |  | | | |  | |  | | | |  | |  | |  |
| 13. I other people think that I am too thin. | |  | | | |  | |  | | | |  | |  | |  |
| 14. I am preoccupied with the thought of having fat on my body. | |  | | | |  | |  | | | |  | |  | |  |
| 15. I take longer than others to eat my meals. | |  | | | |  | |  | | | |  | |  | |  |
| 16. I avoid foods with sugar in them. | |  | | | |  | |  | | | |  | |  | |  |
| 17. I eat diet foods. | |  | | | |  | |  | | | |  | |  | |  |
| 18. I feel that food controls my life. | |  | | | |  | |  | | | |  | |  | |  |
| 19. I display self-control around food. | |  | | | |  | |  | | | |  | |  | |  |
| 20. I feel that others pressure me to eat. | |  | | | |  | |  | | | |  | |  | |  |
| 21. I give too much time and thought to food. | |  | | | |  | |  | | | |  | |  | |  |
| 22. I feel uncomfortable after eating sweets. | |  | | | |  | |  | | | |  | |  | |  |
| 23. I engage in dieting behavior. | |  | | | |  | |  | | | |  | |  | |  |
|  | |  | | | |  | |  | | | |  | |  | |  |
| 24. I like my stomach to be empty. | |  | | | |  | |  | | | |  | |  | |  |
| 25. I have the impulse to vomit after meals. | |  | | | |  | |  | | | |  | |  | |  |
| 26. I enjoy trying new rich foods. | |  | | | |  | |  | | | |  | |  | |  |
| **Behaviour:** | | | | | | | | | | | | | | | | |
|  | | | | Never | | Once a month or less | | Two to three times a month or less | | | | Once a week | | 2-6 times a week | | Once a day or more |
| Gone on eating binges where you feel that you may not be able to stop? (Defined as eating much more than most people would under the same circumstances and feeling that eating is out of control.) | | | |  | |  | |  | | | |  | |  | |  |
| Ever made yourself sick (vomited) to control your weight or shape? | | | |  | |  | |  | | | |  | |  | |  |
| Ever used laxatives, diet pills or diuretics (water pills) to control your weight or shape? | | | |  | |  | |  | | | |  | |  | |  |
| Exercised more than 60 minutes a day to lose or to control your weight? | | | |  | |  | |  | | | |  | |  | |  |
| Lost 9 kg or more in the past 6 months? | | | | | | | | | | | | -( ) Yes  -( ) No | | | | |
| Gain 9 kg or more in the past 6 months? | | | | | | | | | | | | -( ) Yes  -( ) No | | | | |
| Have you ever been treated for an eating disorder? | | | | | | | | | | | | -( ) Yes  -( ) No | | | | |
| **Section 4: Eating habitis** | | | | | | | | | | | | | | | | |
| How do you describe your coffee consumption ? | | | | | | | | | -( ) I don"t consumed it at all  -( ) I haven"t consumed it during the last 30 days but before that I was consumed it regularly  -( ) I consumed it daily  -( ) I consumed it many times a week  -( ) I consumed it many times a month  -( ) I consumed it many times a year | | | | | | | |
| How many cups of coffee ( arabica coffee , Turkish coffee, Nescafe or cuppuccion )do you consumed based on your answer in the previous question ? | | | | | | | | | -( ) 0 cup / duration  -( ) 1 cup / duration  -( ) 2 cups / duration  -( ) 3 cups / duration  -( ) 4 cups / duration  -( ) 5 cups / duration  -( ) 6 or more cups / duration | | | | | | | |
| How do you describe your soft drinks ( cola , Fanta or seven up )consumption ? | | | | | | | | | -( ) I don"t consumed it at all  -( ) I haven"t consumed it during the last 30 days but before that I was consumed it regularly  -( ) I consumed it daily  -( ) I consumed it many times a week  -( ) I consumed it many times a month  -( ) I consumed it many times a year | | | | | | | |
| How many cans of soft drinks do you consumed based on your answer in the previous question | | | | | | | | | -( ) 0 can / duration  -( ) 1 cans / duration  -( ) 2 cans / duration  -( ) 3 cans / duration  -( ) 4 cans / duration  -( ) 5 cans / duration  -( ) 6 or more cans / duration | | | | | | | |
| How do you describe your energy drinks consumption ? | | | | | | | | | -( ) I don"t consumed it at all  -( ) I haven"t consumed it during the last 30 days but before that I was consumed it regularly  -( ) I consumed it daily  -( ) I consumed it many times a week  -( ) I consumed it many times a month  -( ) I consumed it many times a year | | | | | | | |
| How many cans of energy drinks do you consumed based on your answer in the previous question? | | | | | | | | | -( ) 0 can / duration  -( ) 1 cans / duration  -( ) 2 cans / duration  -( ) 3 cans / duration  -( ) 4 cans / duration  -( ) 5 cans / duration  -( ) 6 or more cans / duration | | | | | | | |
| How do you describe your chocolates consumption ? | | | | | | | | | -( ) I don"t consumed it at all  -( ) I haven"t consumed it during the last 30 days but before that I was consumed it regularly  -( ) I consumed it daily  -( ) I consumed it many times a week  -( ) I consumed it many times a month  -( ) I consumed it many times a year | | | | | | | |
| How many bars of chocolates do you consumed based on your answer in the previous question? | | | | | | | | | -( ) 0 bar / duration  -( ) 1 bars / duration  -( ) 2 bars / duration  -( ) 3 bars / duration  -( ) 4 bars / duration  -( ) 5 bars / duration  -( ) 6 or more bars / duration | | | | | | | |
